# Supplementary material
Source: Frontiers journal article supplement (https://www.frontiersin.org/articles/417330)
Supplement: Data_Sheet_2.pdf [file Data_Sheet_2.pdf]

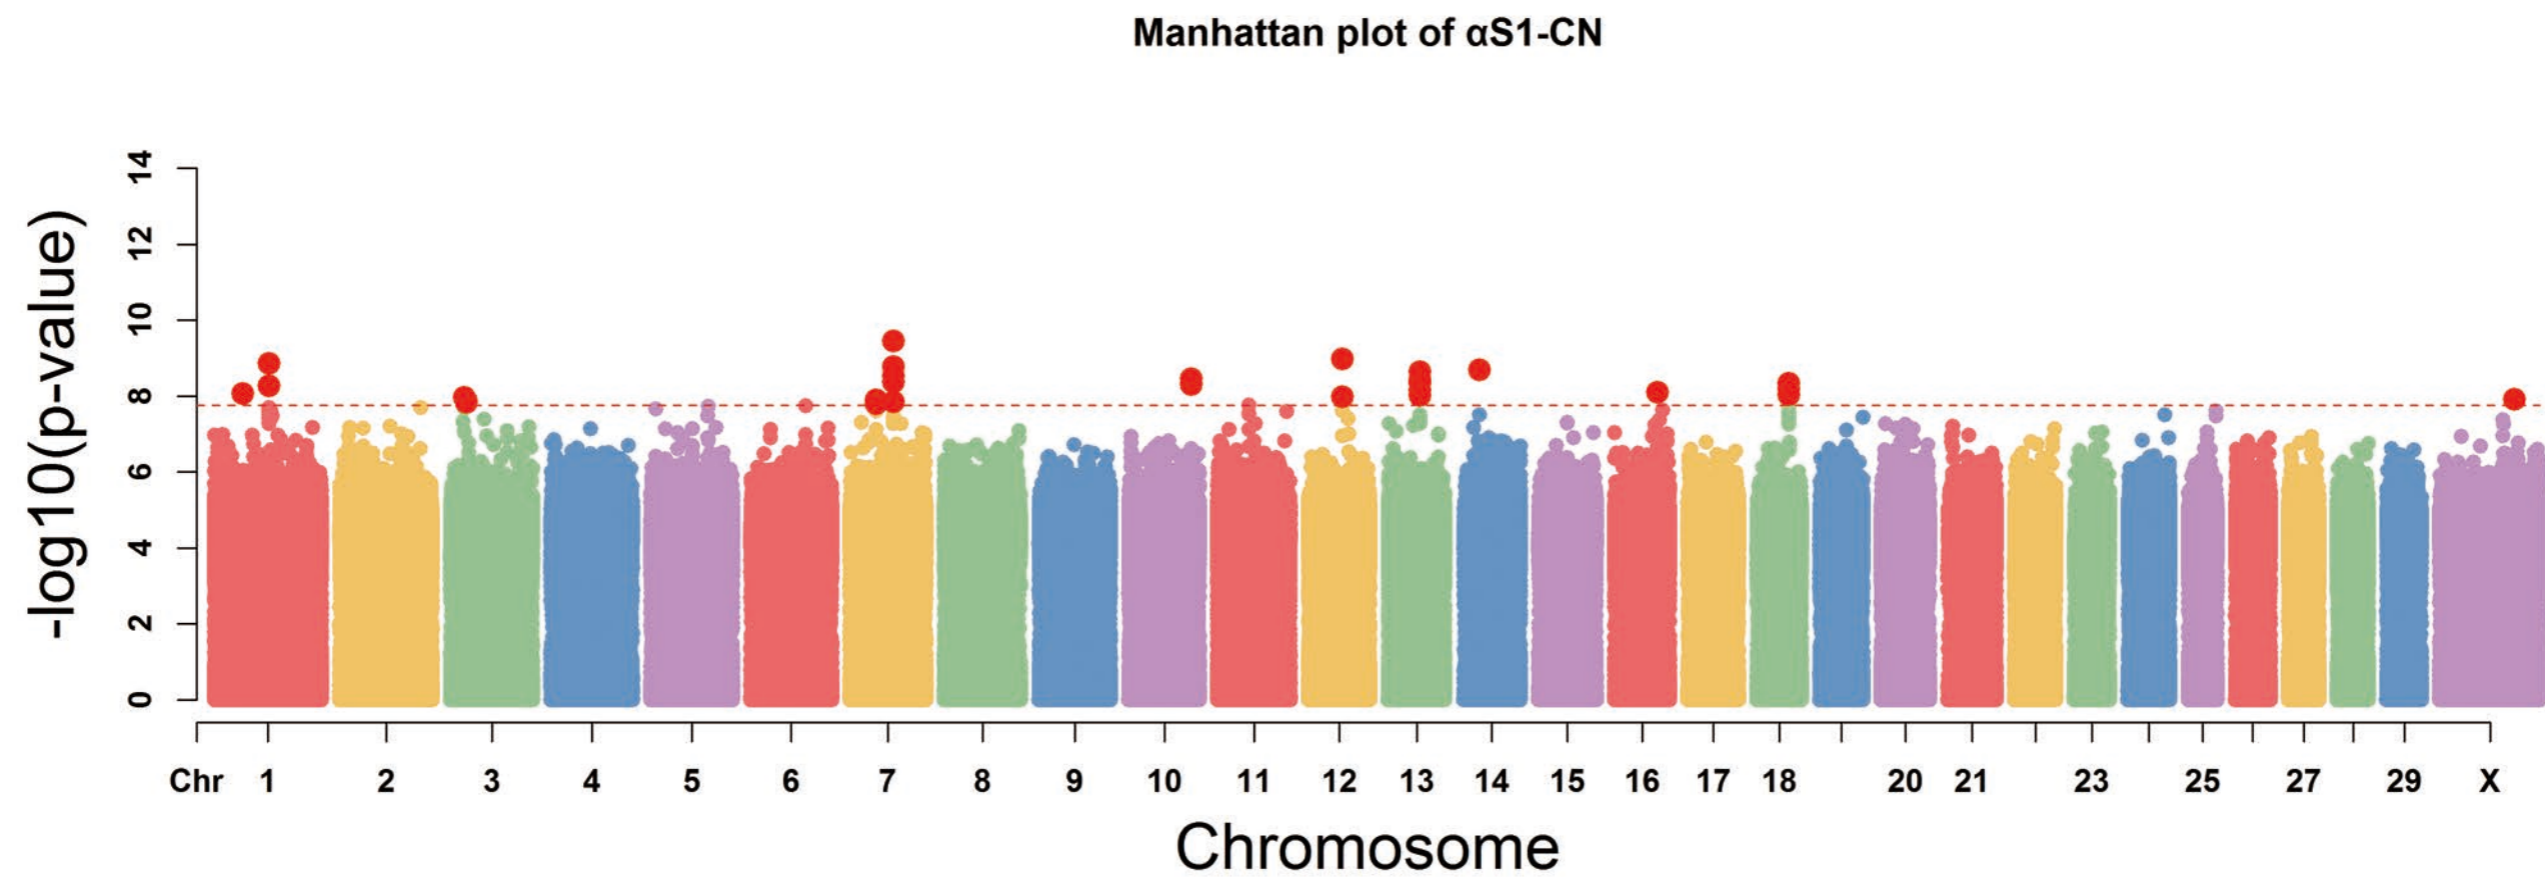

Fig. S10. Manhattan plot for the  $-\log_{10}$  (P-value) of single SNP associated with  $\alpha$ S1-CN

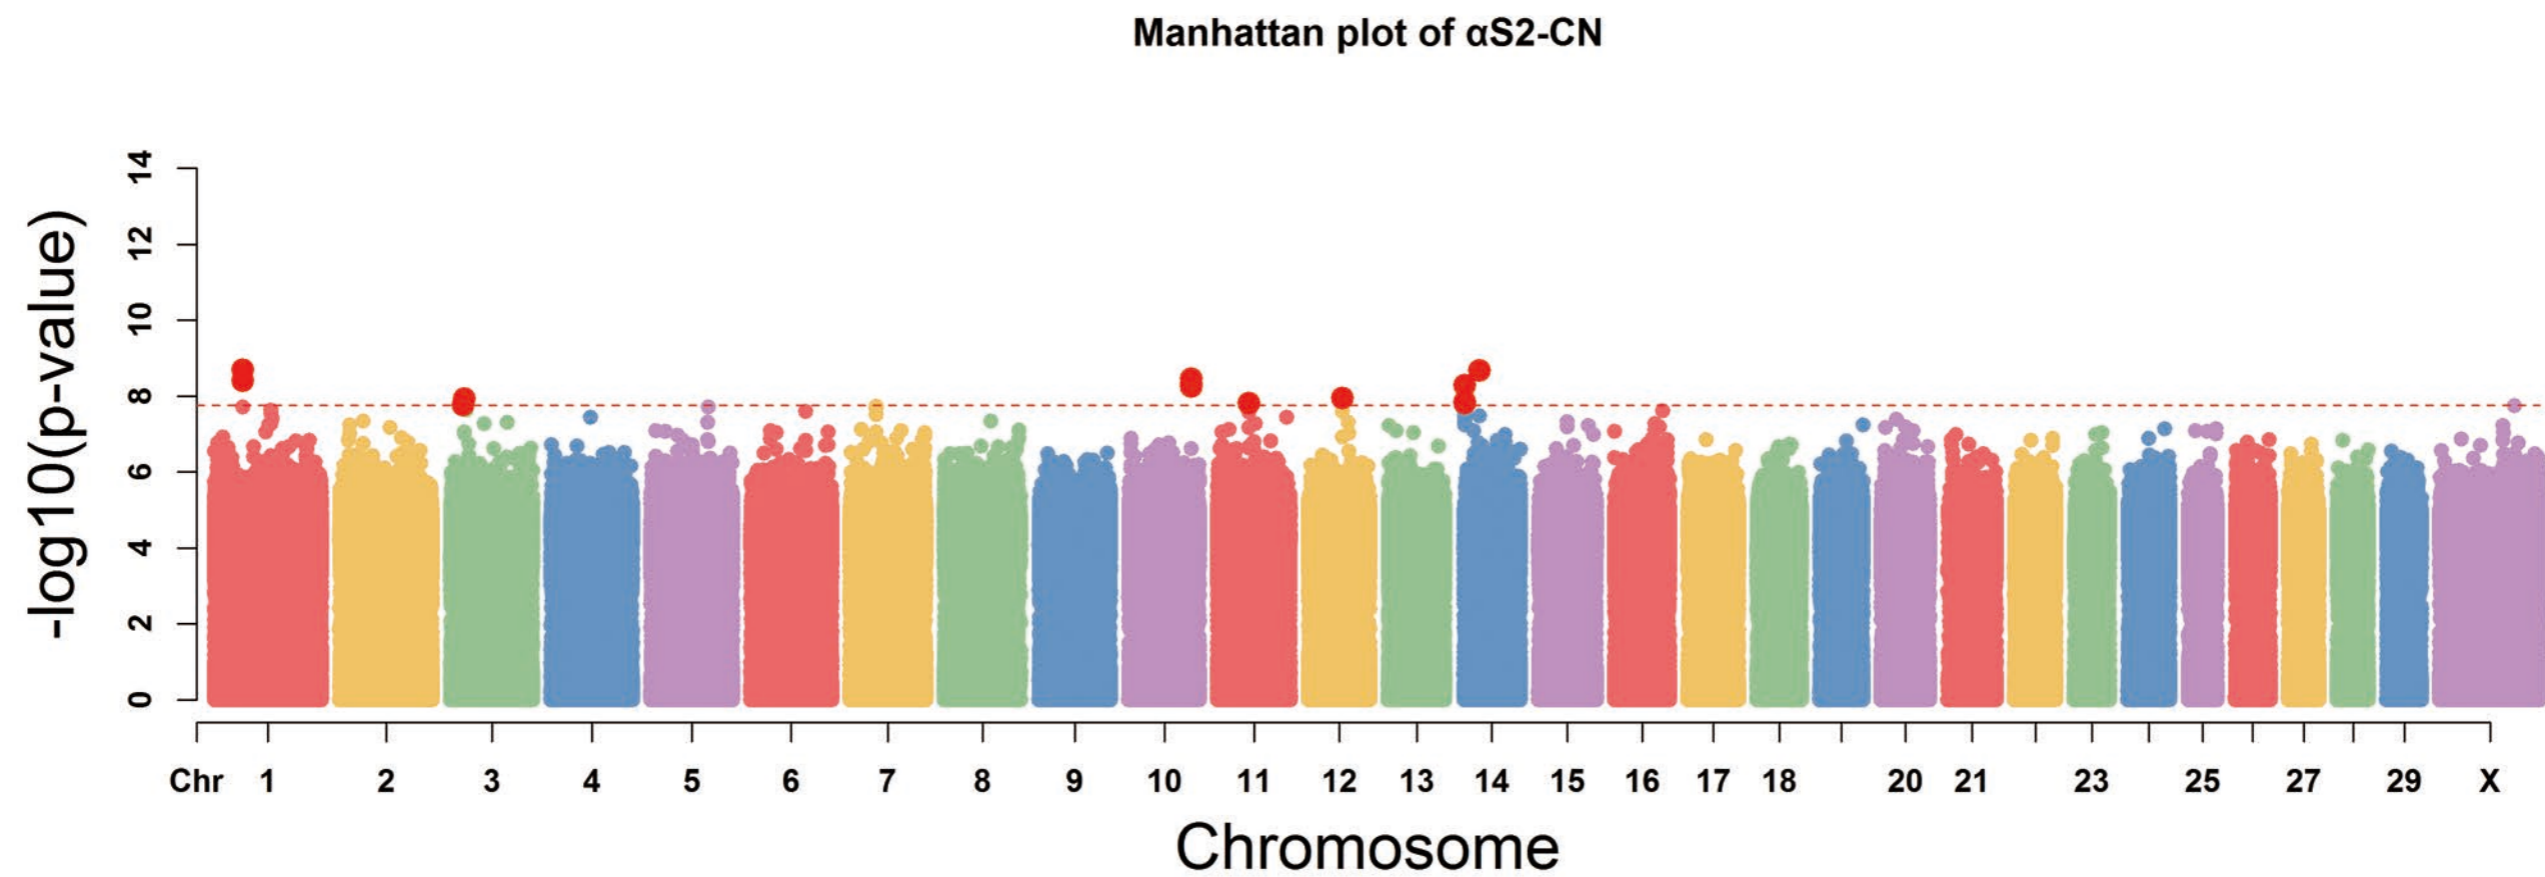

Fig. S11. Manhattan plot for the  $-\log_{10}$  (P-value) of single SNP associated with  $\alpha$ S2-CN

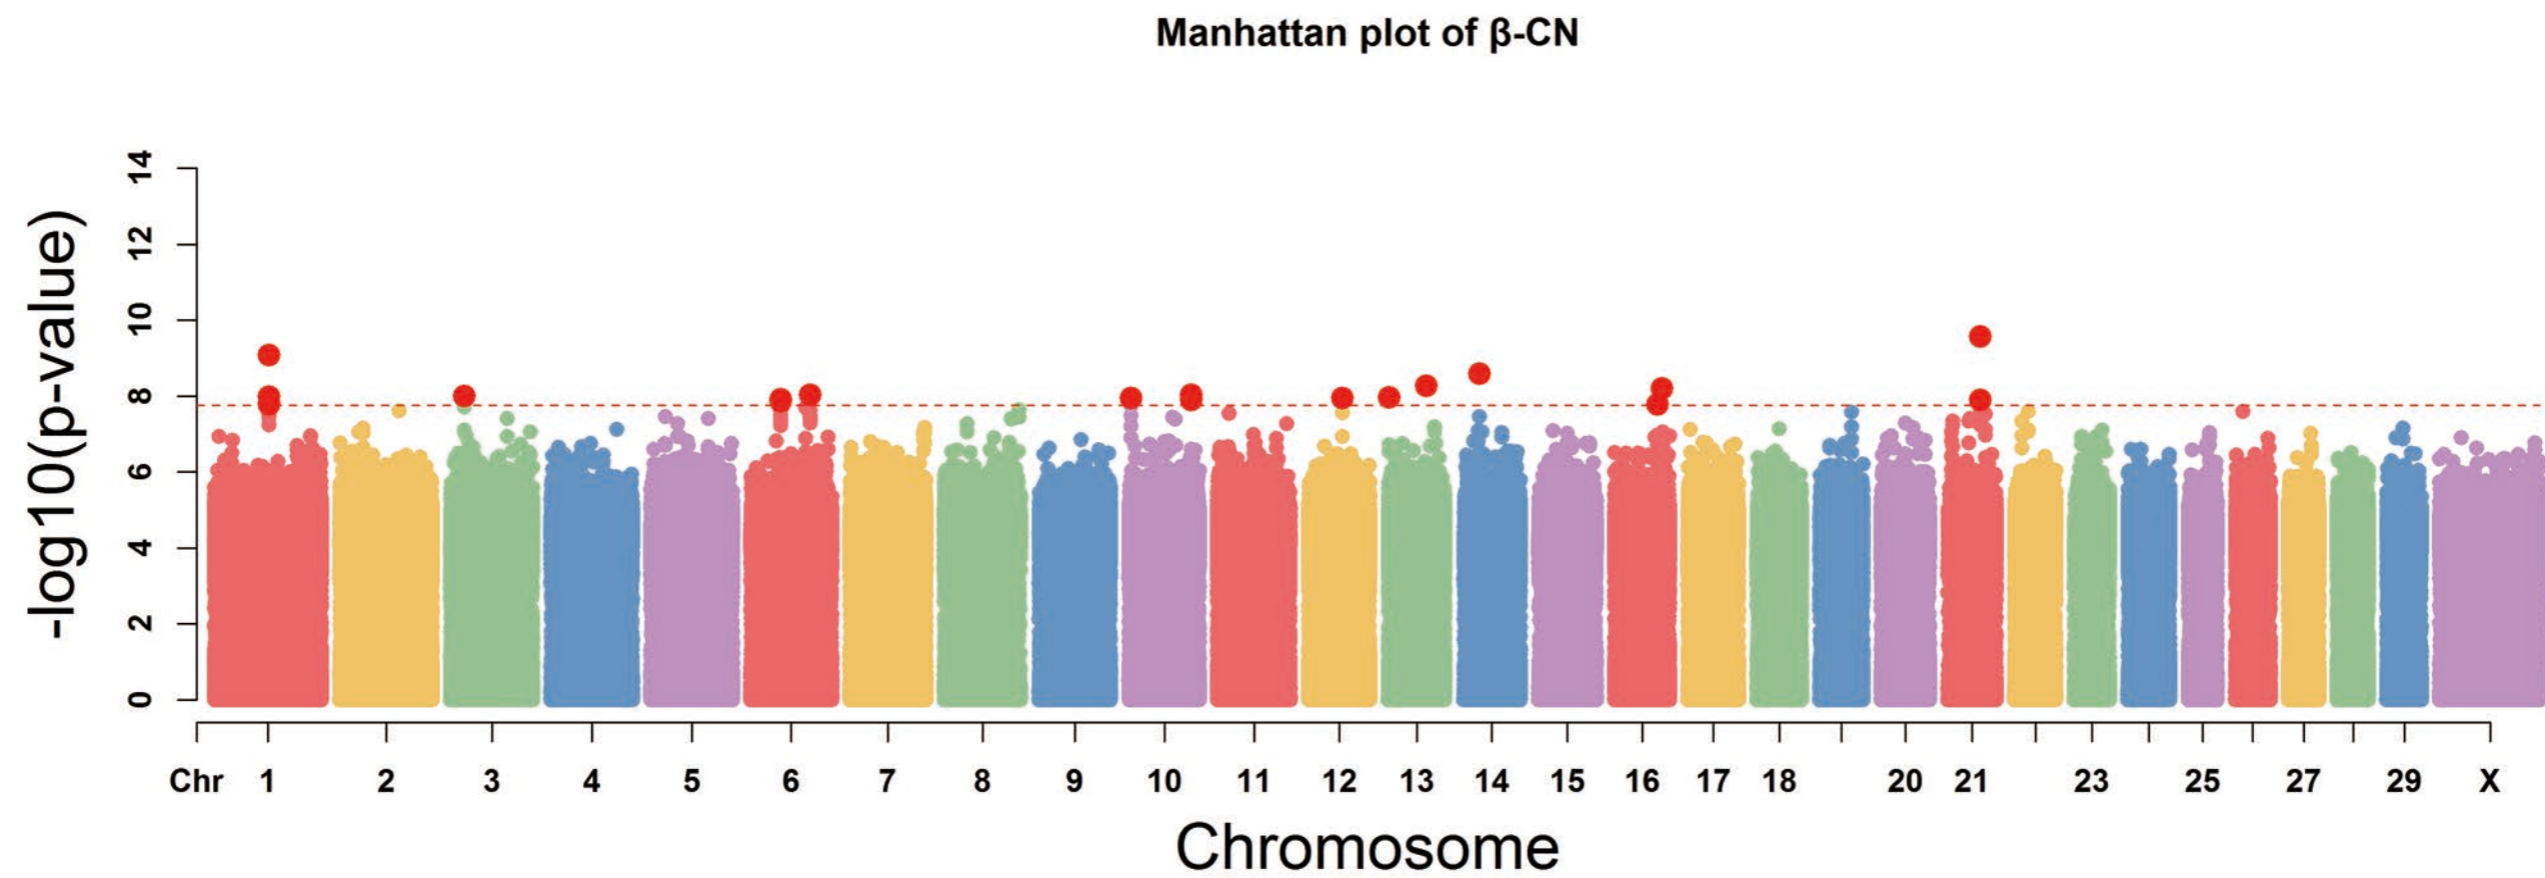

Fig. S12. Manhattan plot for the  $-\log_{10}(\text{P-value})$  of single SNP associated with  $\beta$ -CN

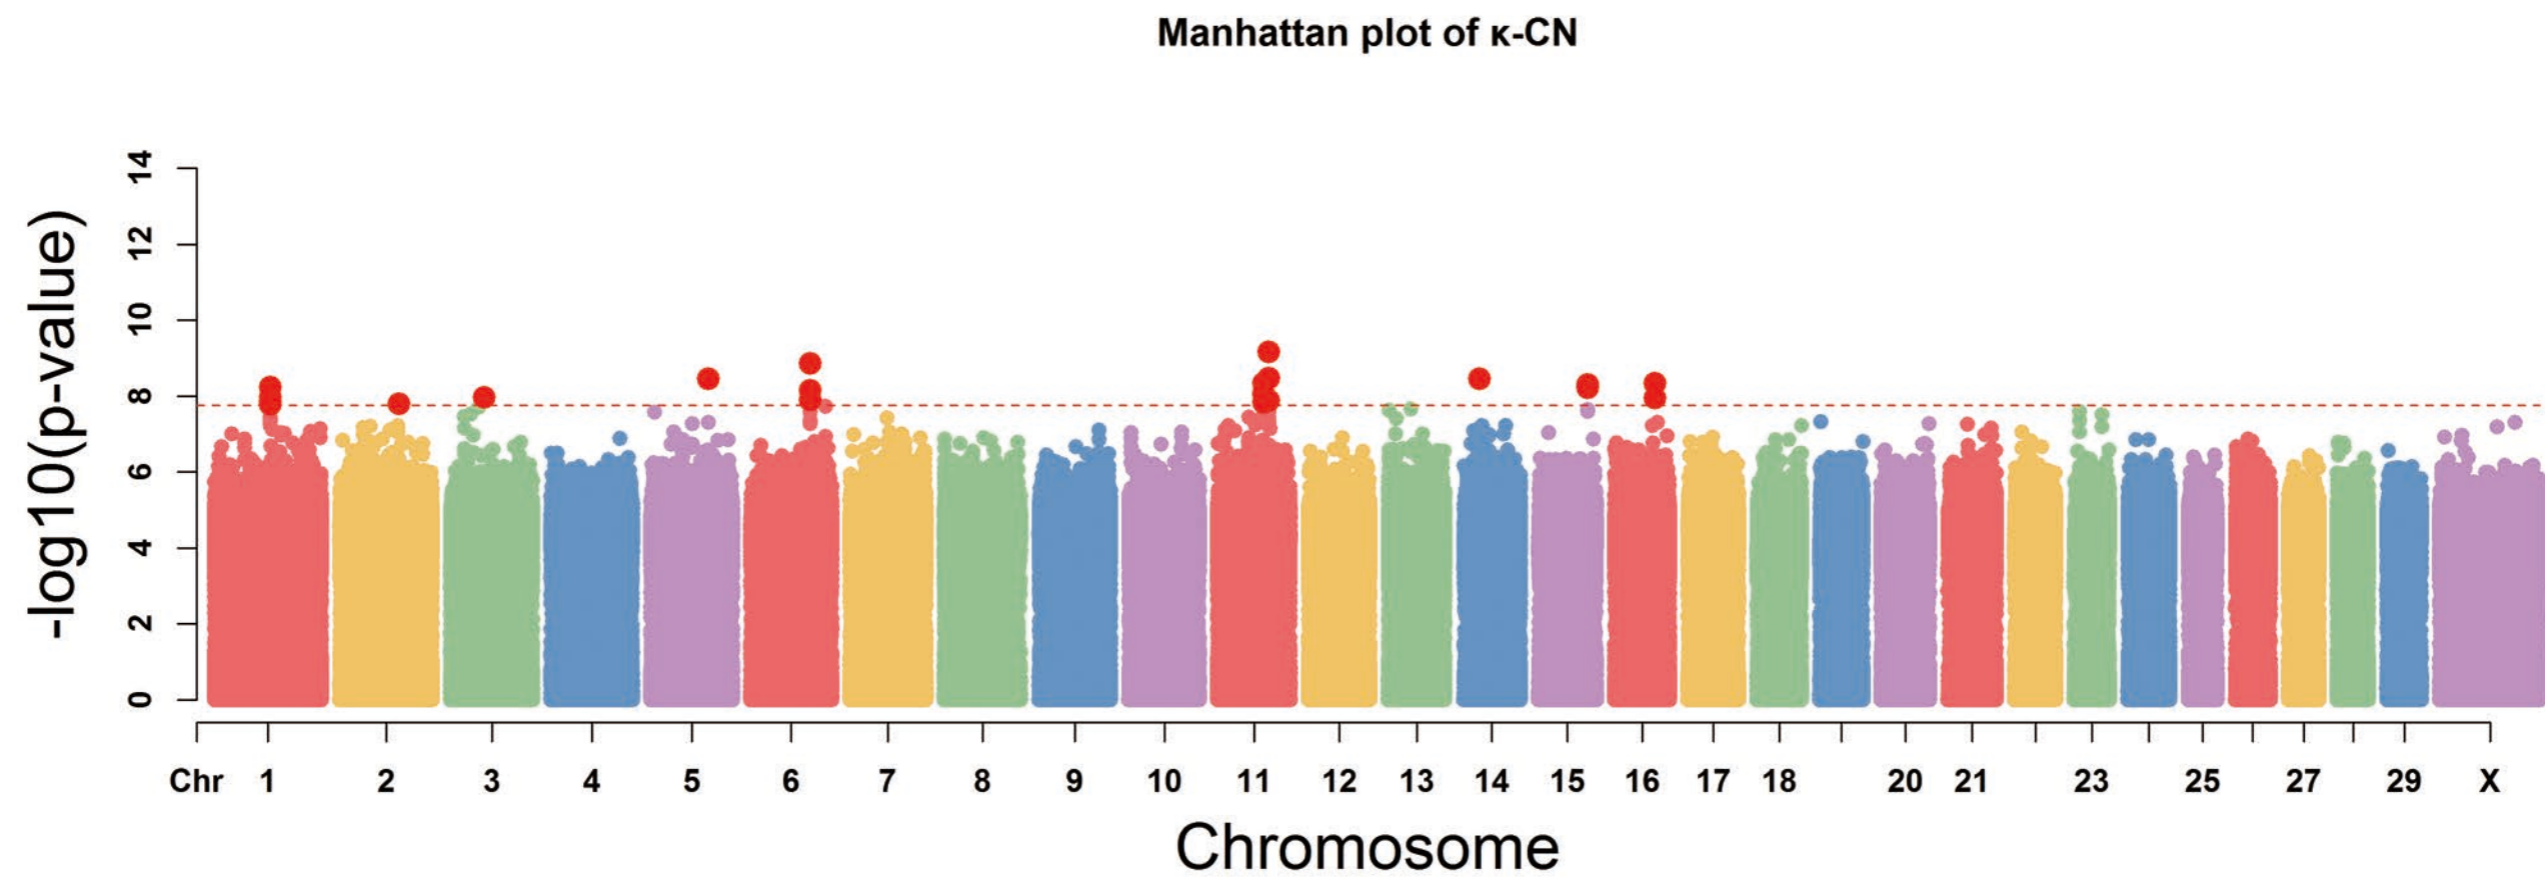

Fig. S13. Manhattan plot for the  $-\log_{10}$  (P-value) of single SNP associated with  $\kappa$ -CN

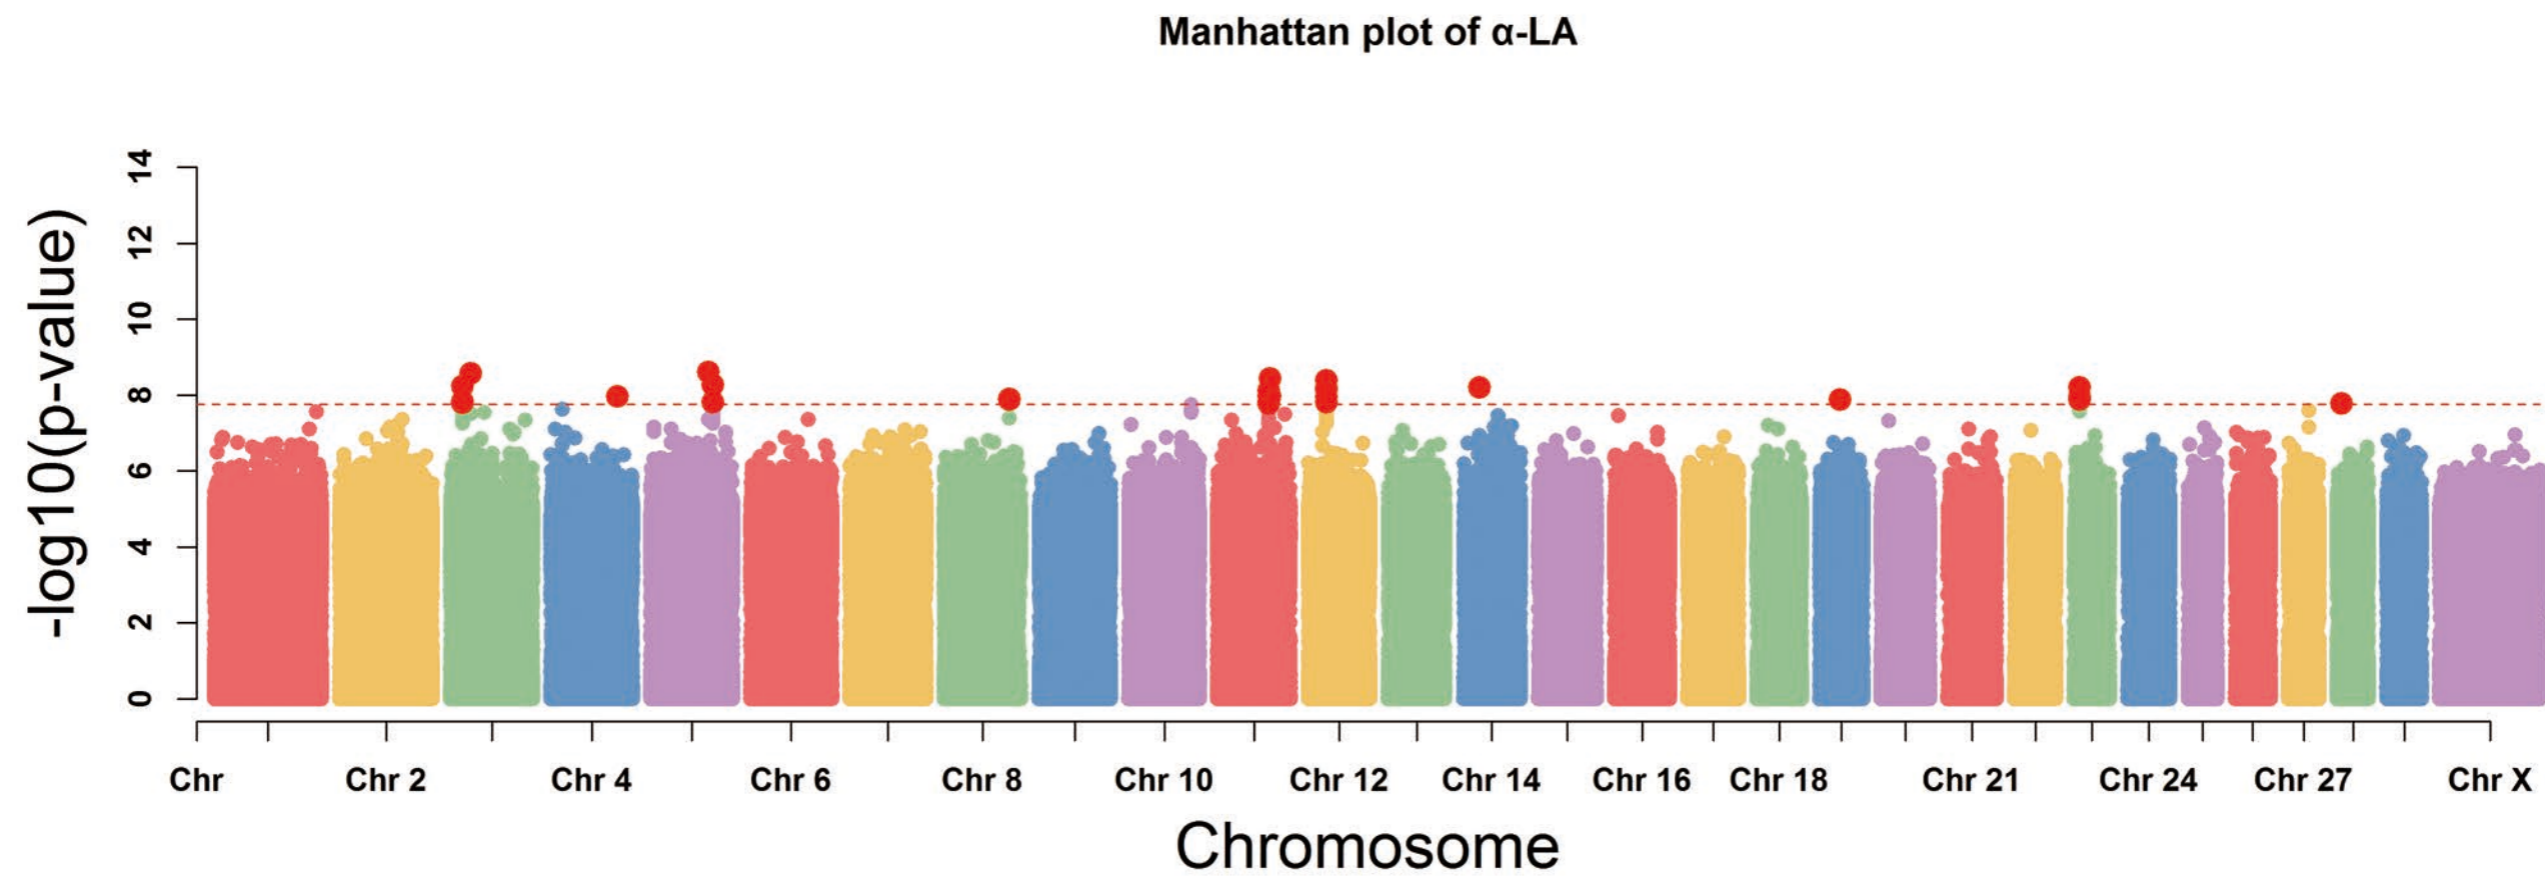

Fig. S14. Manhattan plot for the  $-\log_{10}(\text{P-value})$  of single SNP associated with  $\alpha$ -LA

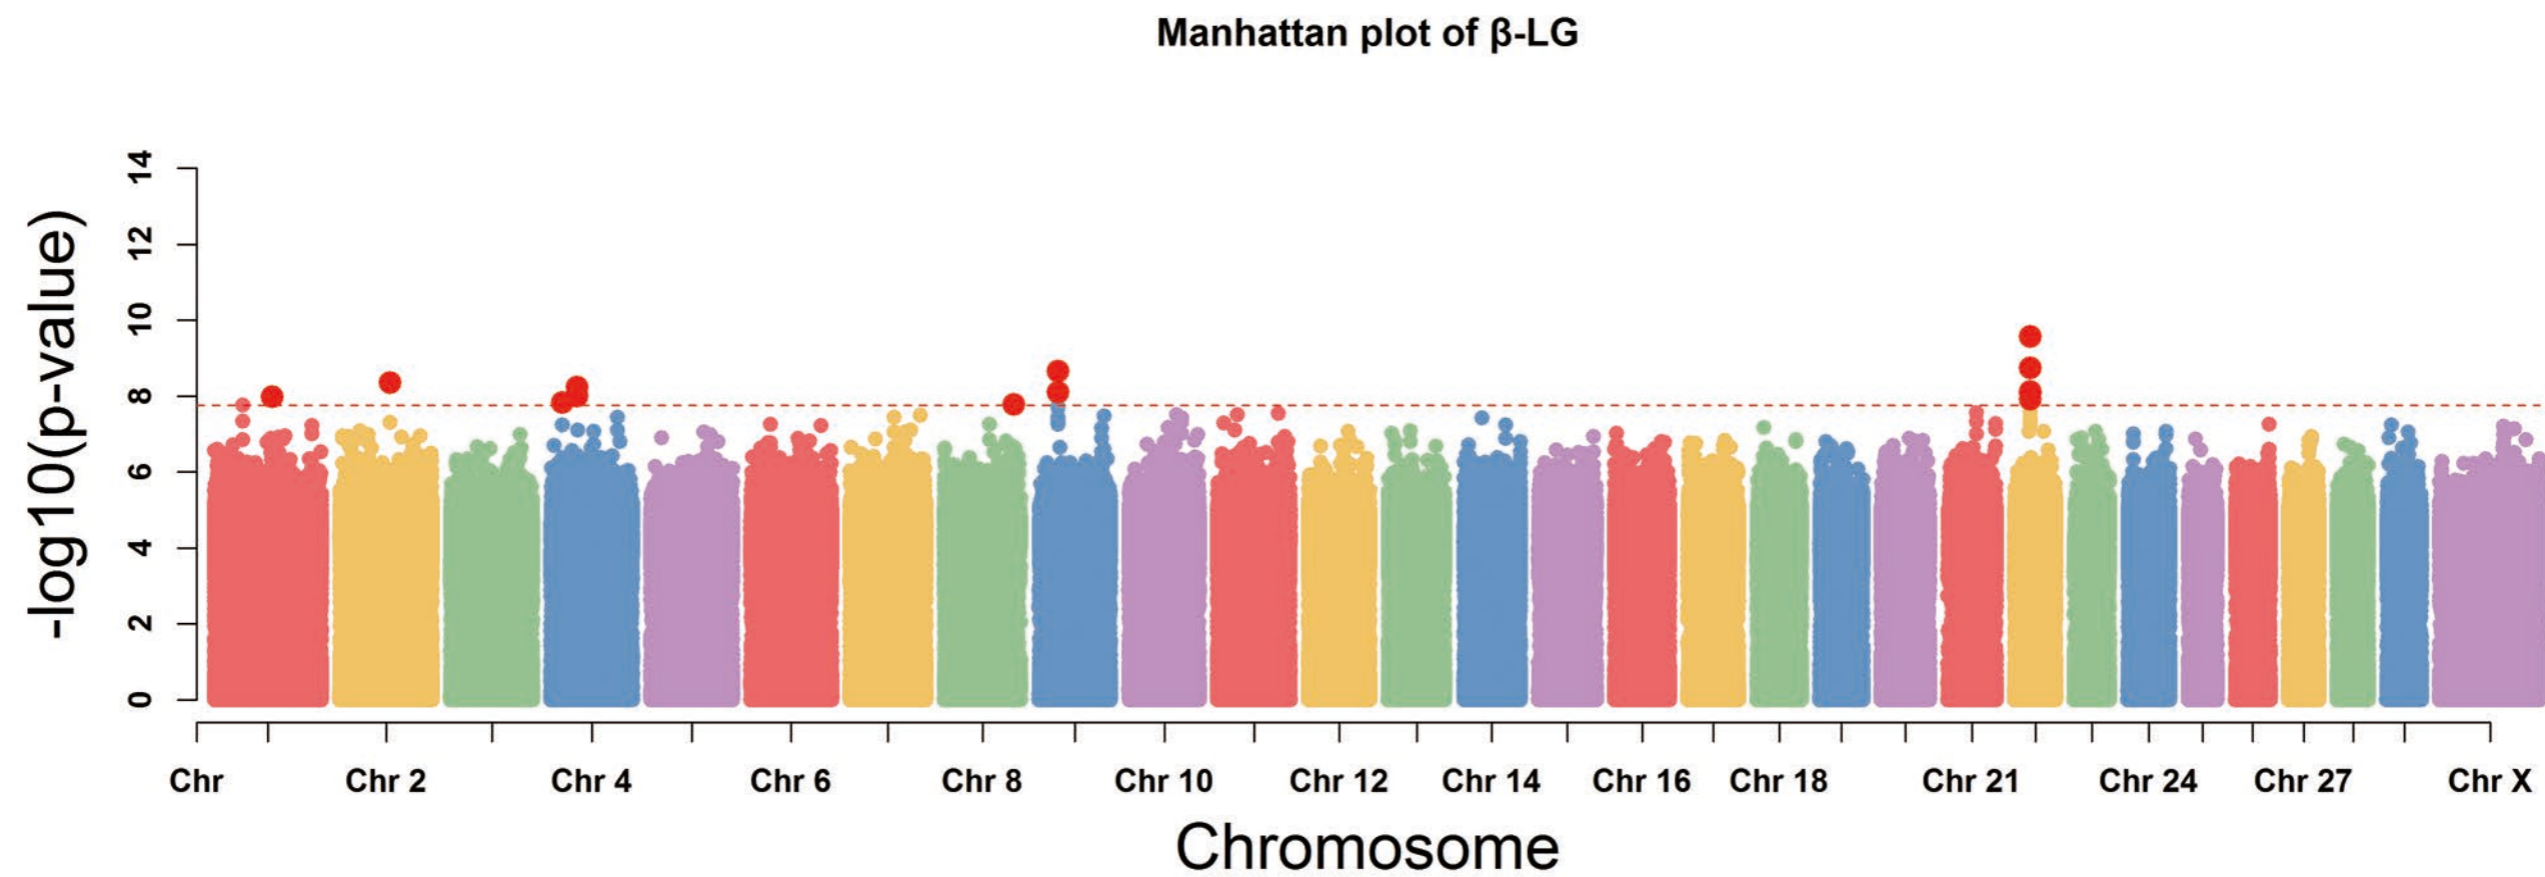

Fig. S15. Manhattan plot for the  $-\log_{10}(\text{P-value})$  of single SNP associated with  $\beta$ -LG

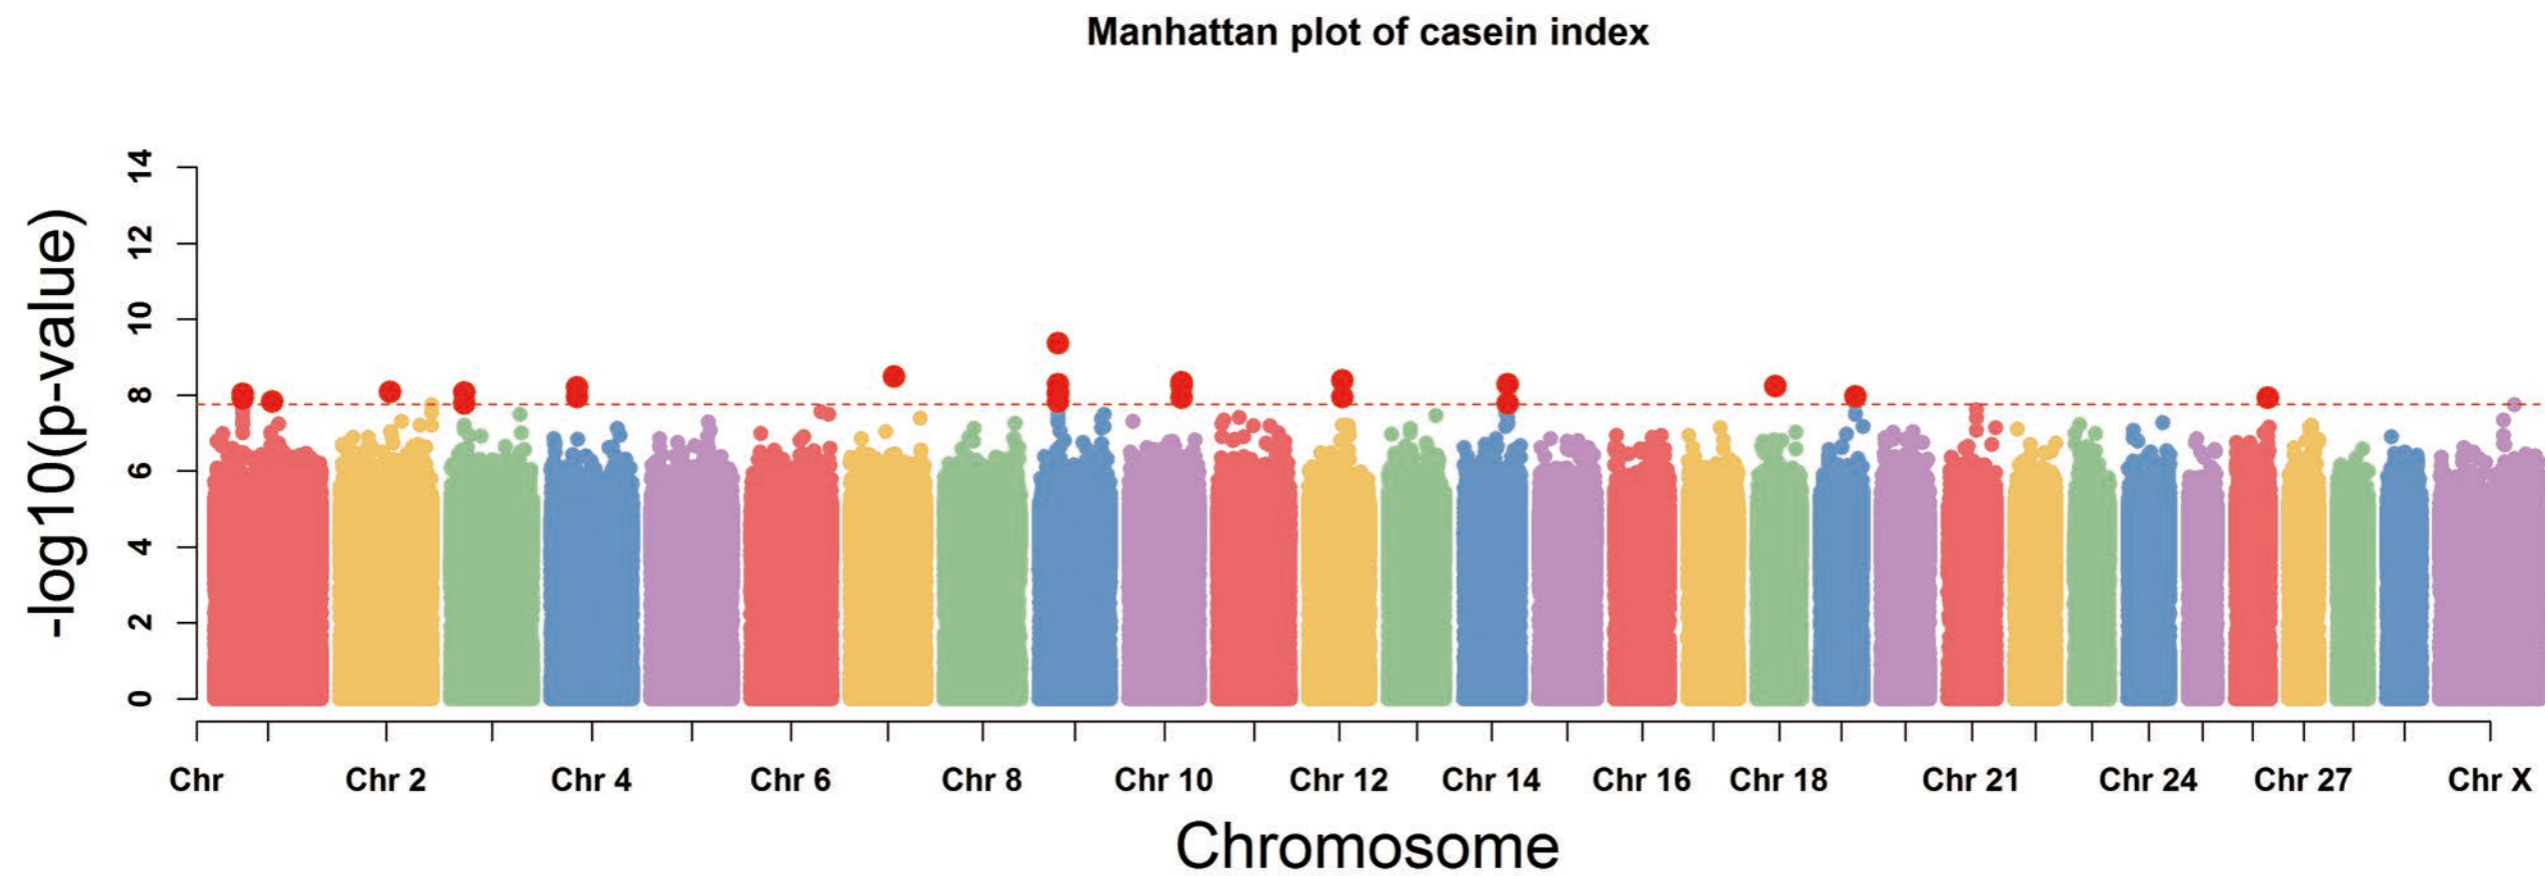

Fig. S16. Manhattan plot for the  $-\log_{10}(\text{P-value})$  of single SNP associated with casein index

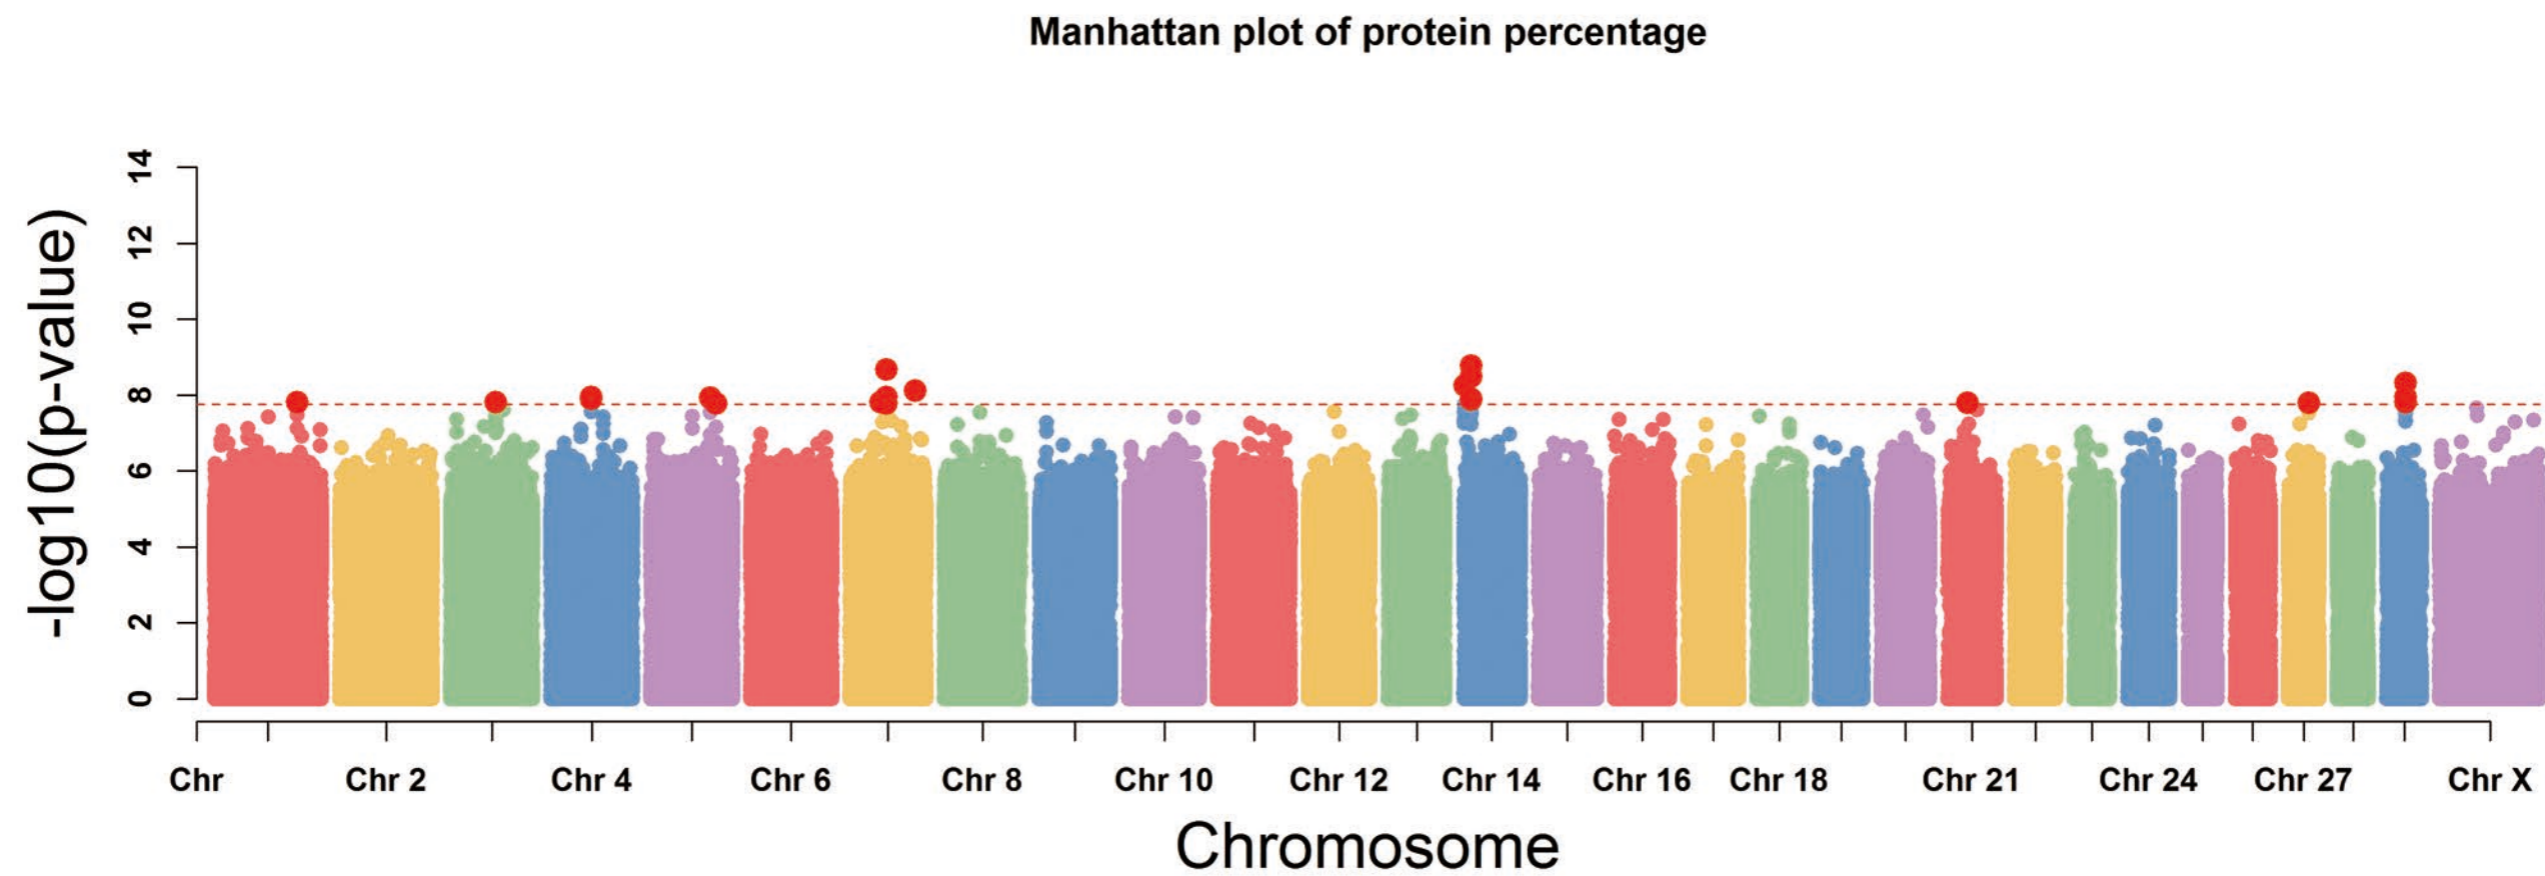

Fig. S17. Manhattan plot for the  $-\log_{10}(\text{P-value})$  of single SNP associated with protein percentage

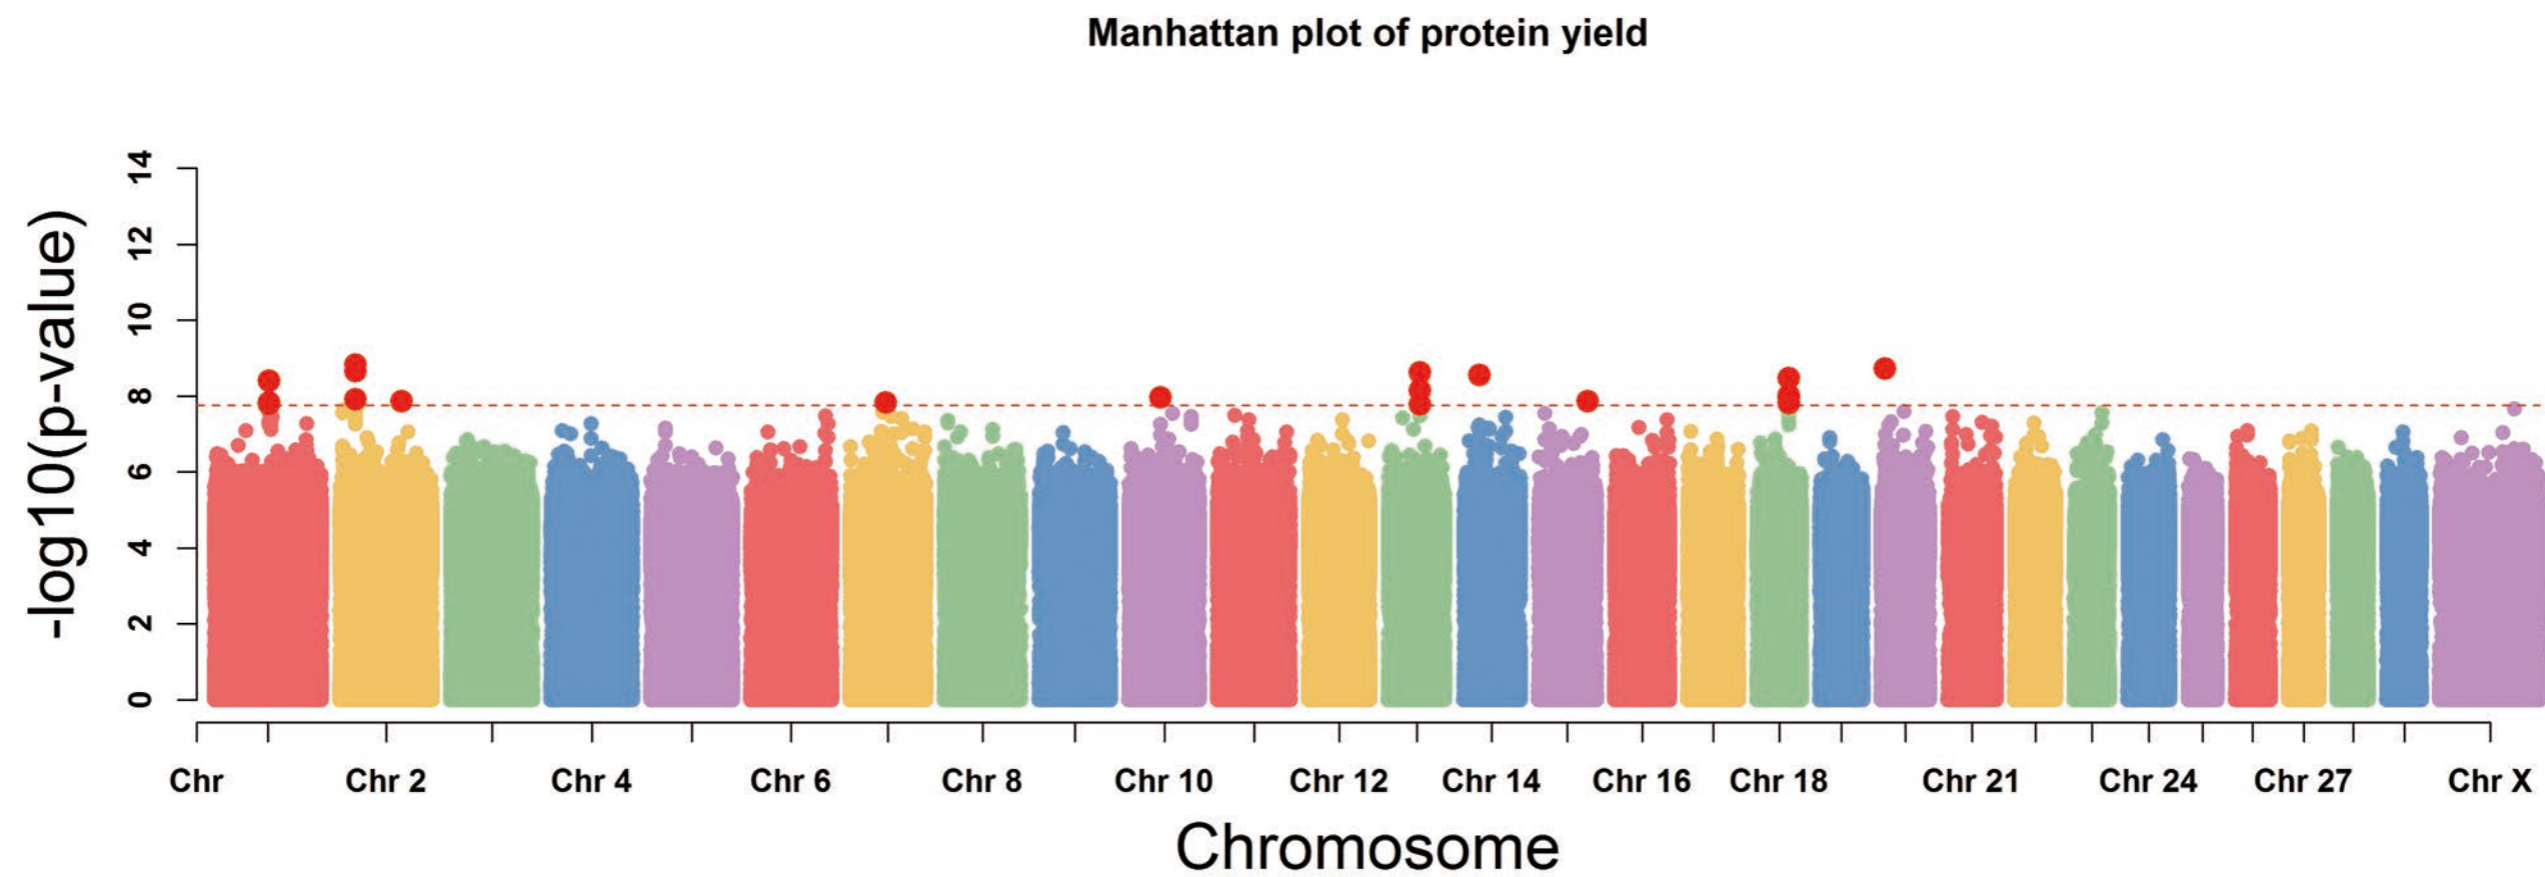

Fig. S18. Manhattan plot for the  $-\log_{10}(\text{P-value})$  of single SNP associated with protein yield

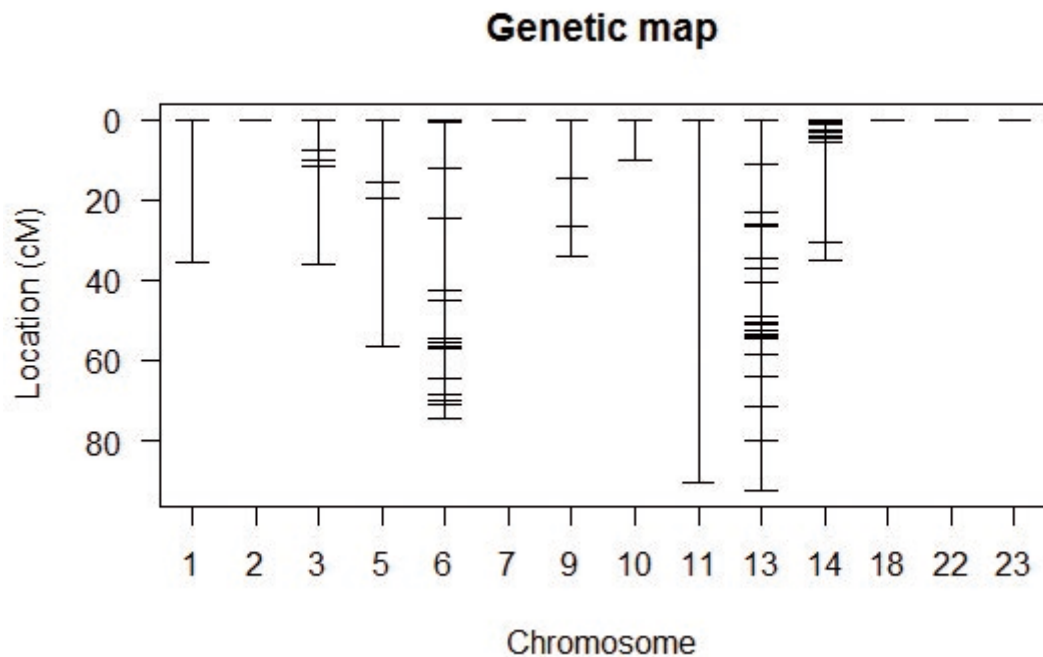

Fig. S19. Genetic map for 118 QTL related to milk protein composition
